# Supplementary material
Source: PubMed Central journal article supplement (PMC7272298)
Supplement: NIHMS1589142-supplement-1.pdf [file NIHMS1589142-supplement-1.pdf]

**FIGURE S1**

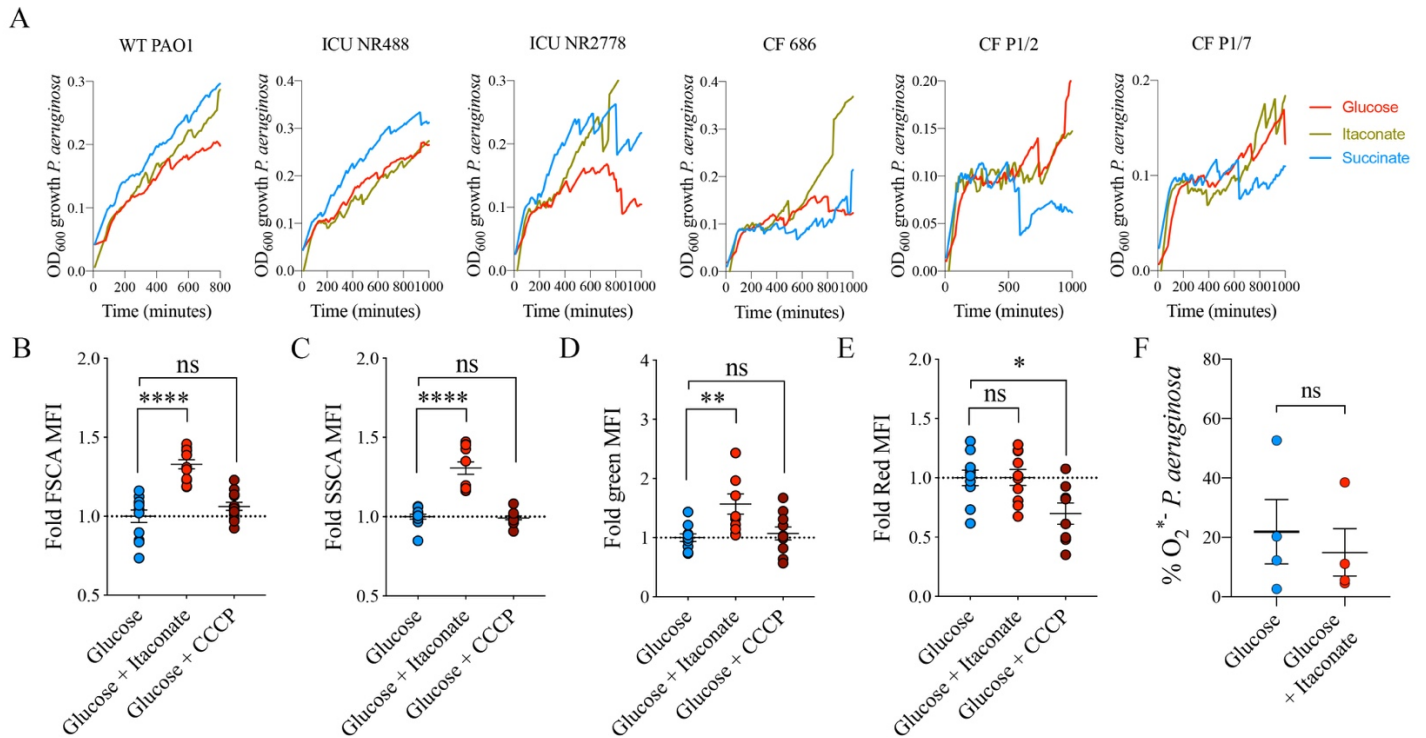

**FIGURE S1, related to FIGURE 1. Itaconate metabolism is associated with *in vivo* host adaptation and membrane deregulations in *P. aeruginosa*.**

**A)** *P. aeruginosa* growth curves in M9 media supplemented either with itaconate, succinate or glucose for PAO1, two ICU isolates (NR488, NR2778) and 3 CF clinical isolates (CF 686, CF P 1/2, CF P1/7).

**B-F)** Bacterial size (Forward FSCA) (B), bacterial surface granularity (Scatter SSCA) (C), DiOC<sub>2</sub>(3) green emission (D) and DiOC<sub>2</sub>(3) red emission (E) in *P. aeruginosa* PAO1 incubated overnight in either glucose or glucose + itaconate. CCCP, membrane potential uncoupler, was used as a positive control to determine DiOC<sub>2</sub>(3) specificity.

**F)** Anion superoxide (O<sub>2</sub><sup>-</sup>) production by flow cytometry using Mitosox in *P. aeruginosa* PAO1 incubated either in glucose or glucose + itaconate.

**A** are representative curves from n=2. **B-F**, from n=3. In **B-F**, data are shown as average +/- SEM. **B-E**: One-Way ANOVA; **F**: t-Student. \*\*\*\*:  $P < 0.0001$ ; \*\*:  $P < 0.01$ ; \*:  $P < 0.05$ ; ns: non-significant.

**FIGURE S2**

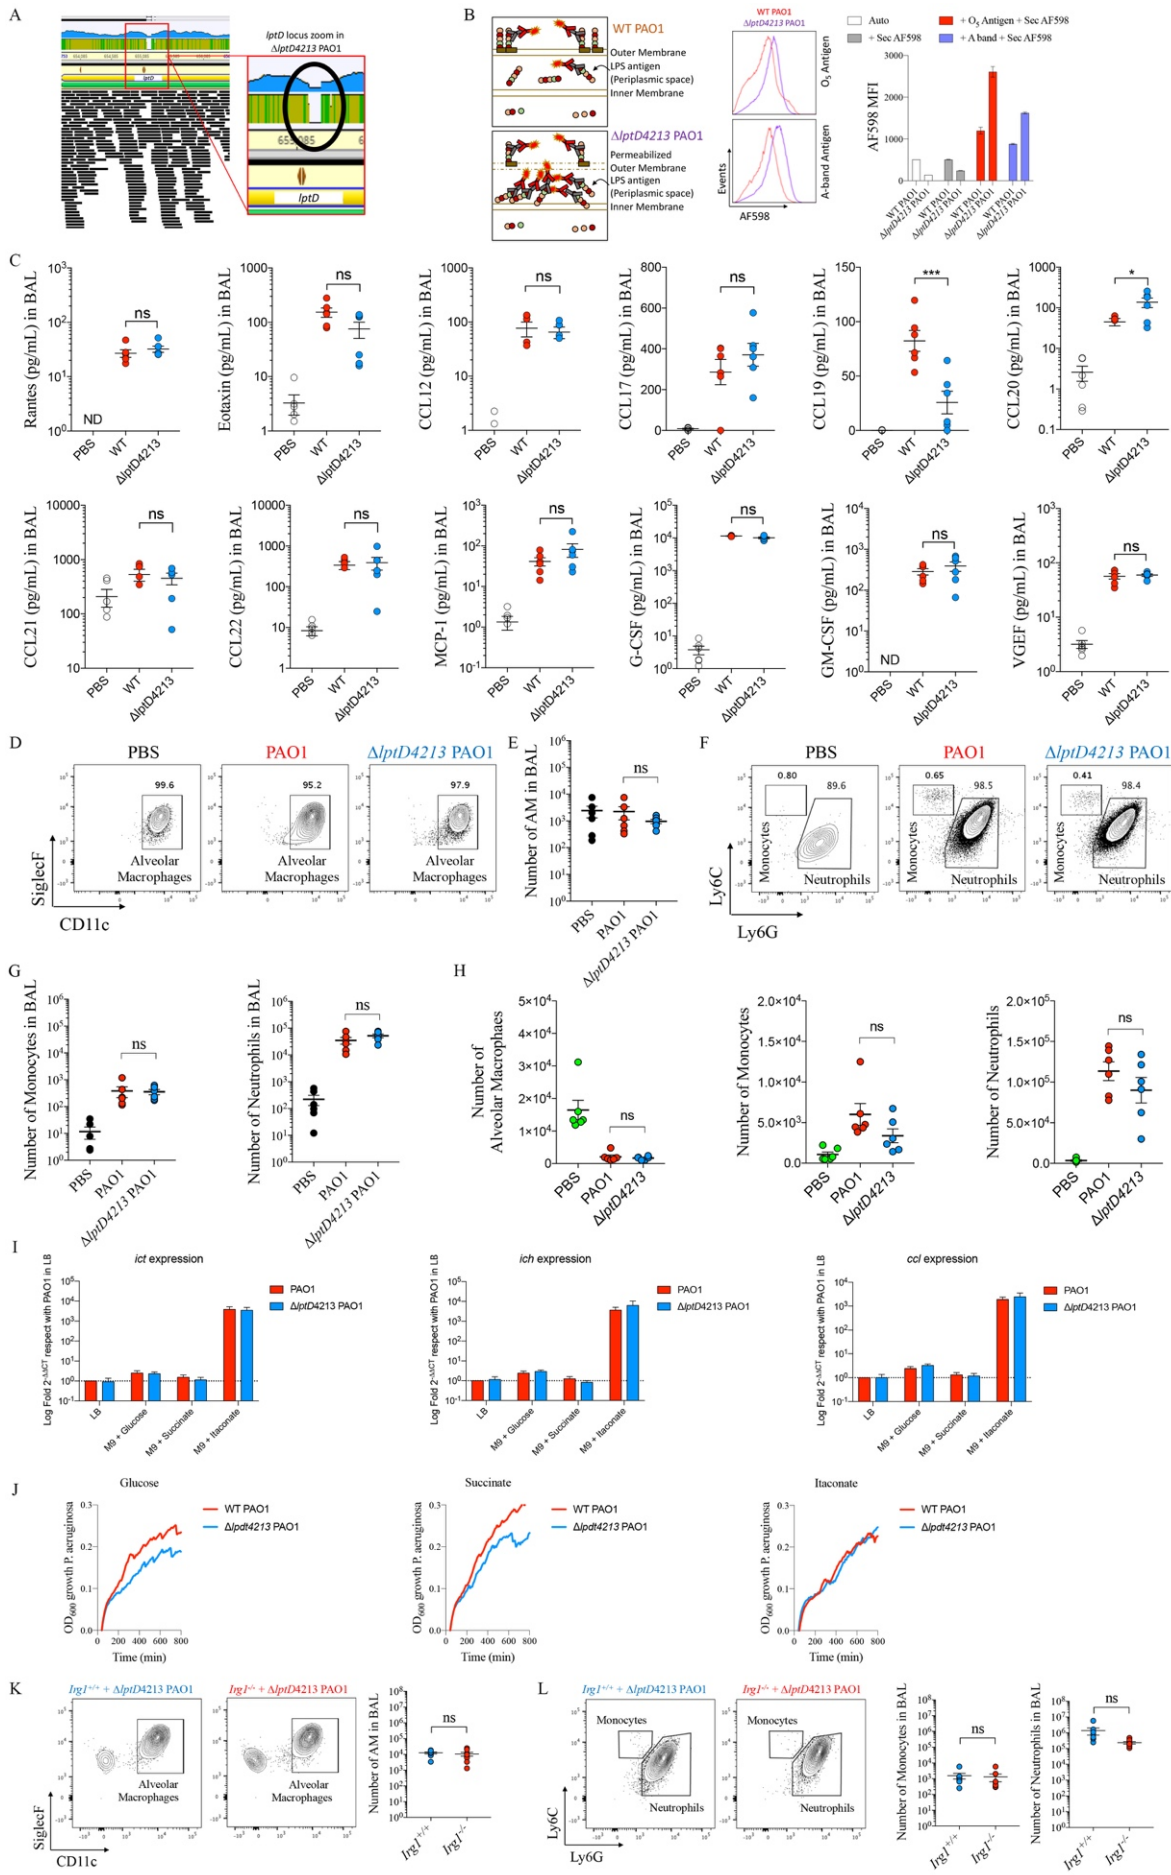

**FIGURE S2, related to FIGURE 2. *lptD* deregulation conserves itaconate metabolism by PAO1.**

**A)** In respect to WT PAO1,  $\Delta lptD4213$  PAO1 exhibits a 69 nucleotide deletion (black circle) in the *lptD* gene that produces a truncated LptD protein lacking 23 amino acids.

**B)** Dysfunctional LptD produces membrane permeability and accumulation of LPS-associated sugars in the periplasmic space of *P. aeruginosa*. Anti-LPS antibodies penetrate the outer membrane and detect accumulated endotoxin-associated carbohydrates (middle histograms and right graphs, by flow cytometry). Anti-LPS carbohydrates antibodies used were anti O<sub>5</sub> antigen and anti A-band sugars.

**C-H)** BAL chemokines by ELISA (C) and myeloid cell numbers in BAL (D-G) and lungs (H) by flow cytometry from WT mice treated with PBS or infected for 16h either with WT PAO1 or  $\Delta lptD4213$  PAO1.

**I)** Expression of *ict*, *ich* and *ccl* by qRT-PCR in WT PAO1 and  $\Delta lptD4213$  PAO1 grown in different media.

**J)** Growth curves for WT PAO1 and  $\Delta lptD4213$  PAO1 in M9 media supplemented either with succinate, glucose or itaconate.

**K-L)** Alveolar macrophages (K) and monocytes/neutrophils (L) by flow cytometry in *Irg1*<sup>+/+</sup> and *Irg1*<sup>-/-</sup> BAL from mice 16h-infected with  $\Delta lptD4213$  PAO1.

Data are shown as average +/- SEM. **C-H** and **K-L** are from n=2 with a total of 6 mice. **C-H**: One-Way ANOVA; **K-L**: t-Student test. \*\*\*:  $P < 0.001$ ; \*:  $P < 0.05$ ; ns: non-significant.

**Figure S3**

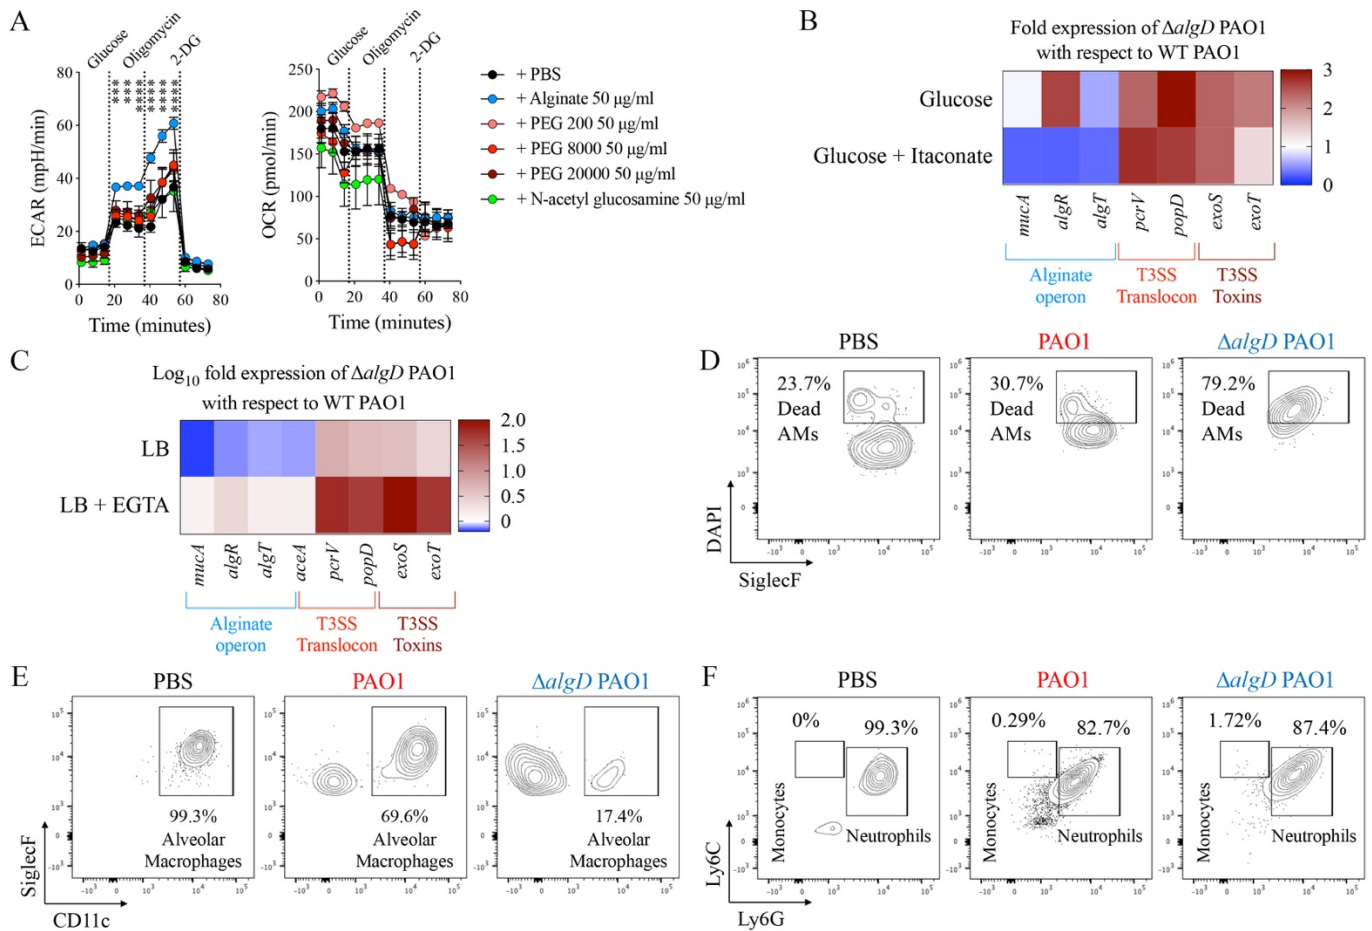

**FIGURE S3, related to FIGURE 3, 4. Increased alginate production promotes myeloid cell activation and accumulation in the murine airway.**

**A)** Glycolysis (ECAR) and oxygen consumption rates (OCR) by Seahorse technology of mouse BMDMs stimulated either with PBS, alginate, polyethylene glycol (200, 8000, 20000 MW) or N-acetyl glucosamine.

**B)** Respect with WT PAO1, fold expression of *mucA*, *algT*, *algR*, *pcrV*, *popD*, *exoS* and *exoT* by qRT-PCR for  $\Delta algD$  PAO1 incubated in M9 + glucose or M9 + glucose + itaconate.

**C)** Respect with WT PAO1, Log<sub>10</sub> fold expression of *mucA*, *algT*, *algR*, *pcrV*, *popD*, *exoS* and *exoT* by qRT-PCR for  $\Delta algD$  PAO1 incubated in LB treated or not with EGTA, which activates type 3 secretion system function.

**D)** DAPI<sup>+</sup> staining (dead cells) for BAL alveolar macrophages from mice treated with PBS or infected either with WT and  $\Delta algD$  PAO1.

**E-F)** Representative density plots for alveolar macrophages (E) and Ly6C<sup>high</sup>Ly6G<sup>low/-</sup> monocytes and Ly6C<sup>low/neg</sup>Ly6G<sup>+</sup> neutrophils (F) from BAL of WT mice treated with PBS or infected with PAO1 WT or  $\Delta algD$  PAO1. Data are shown as average +/- SEM. A is from n=2. **A:** Two-Way ANOVA. **D-F:** In vivo data are from n=2 (7-8 mice total). \*\*\*\*:  $P < 0.0001$ ; \*\*\*:  $P < 0.001$ ; \*\*:  $P < 0.01$ ; ns: non-significant.

FIGURE S4

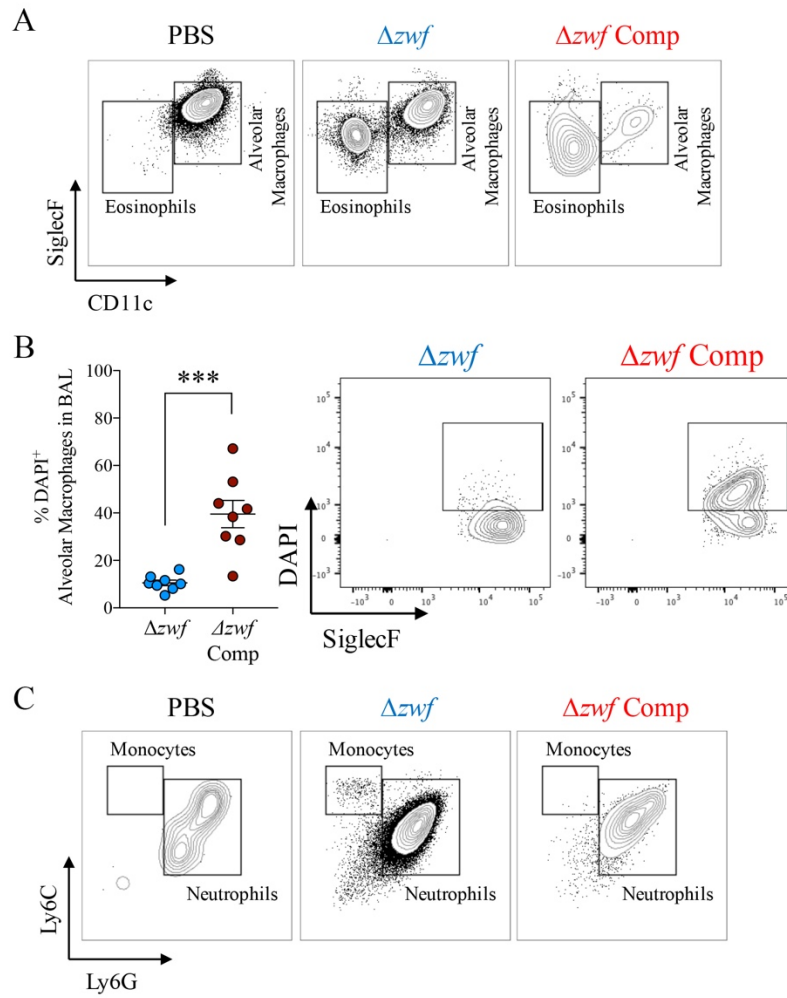

**FIGURE S4, related to 5. *P. aeruginosa* G6PDH activity regulates myeloid cells death.**

**A-C)** Representative density plots for live (DAPI<sup>-</sup>) alveolar macrophages (A), DAPI<sup>+</sup> (dead cells) alveolar macrophages (B) and Ly6C<sup>high</sup>Ly6G<sup>low/-</sup> monocytes and Ly6C<sup>low/neg</sup>Ly6G<sup>+</sup> neutrophils (C) in BAL of mice uninfected (PBS) or 16h infected with  $\Delta zwf$  and  $\Delta zwf$  complemented PAO1. Data are shown as average +/- SEM. **A-C** are representative from n=2 (7-8 mice total). **B:** t-Student test. \*\*\*:  $P < 0.001$ ; ns: non-significant.

FIGURE S5

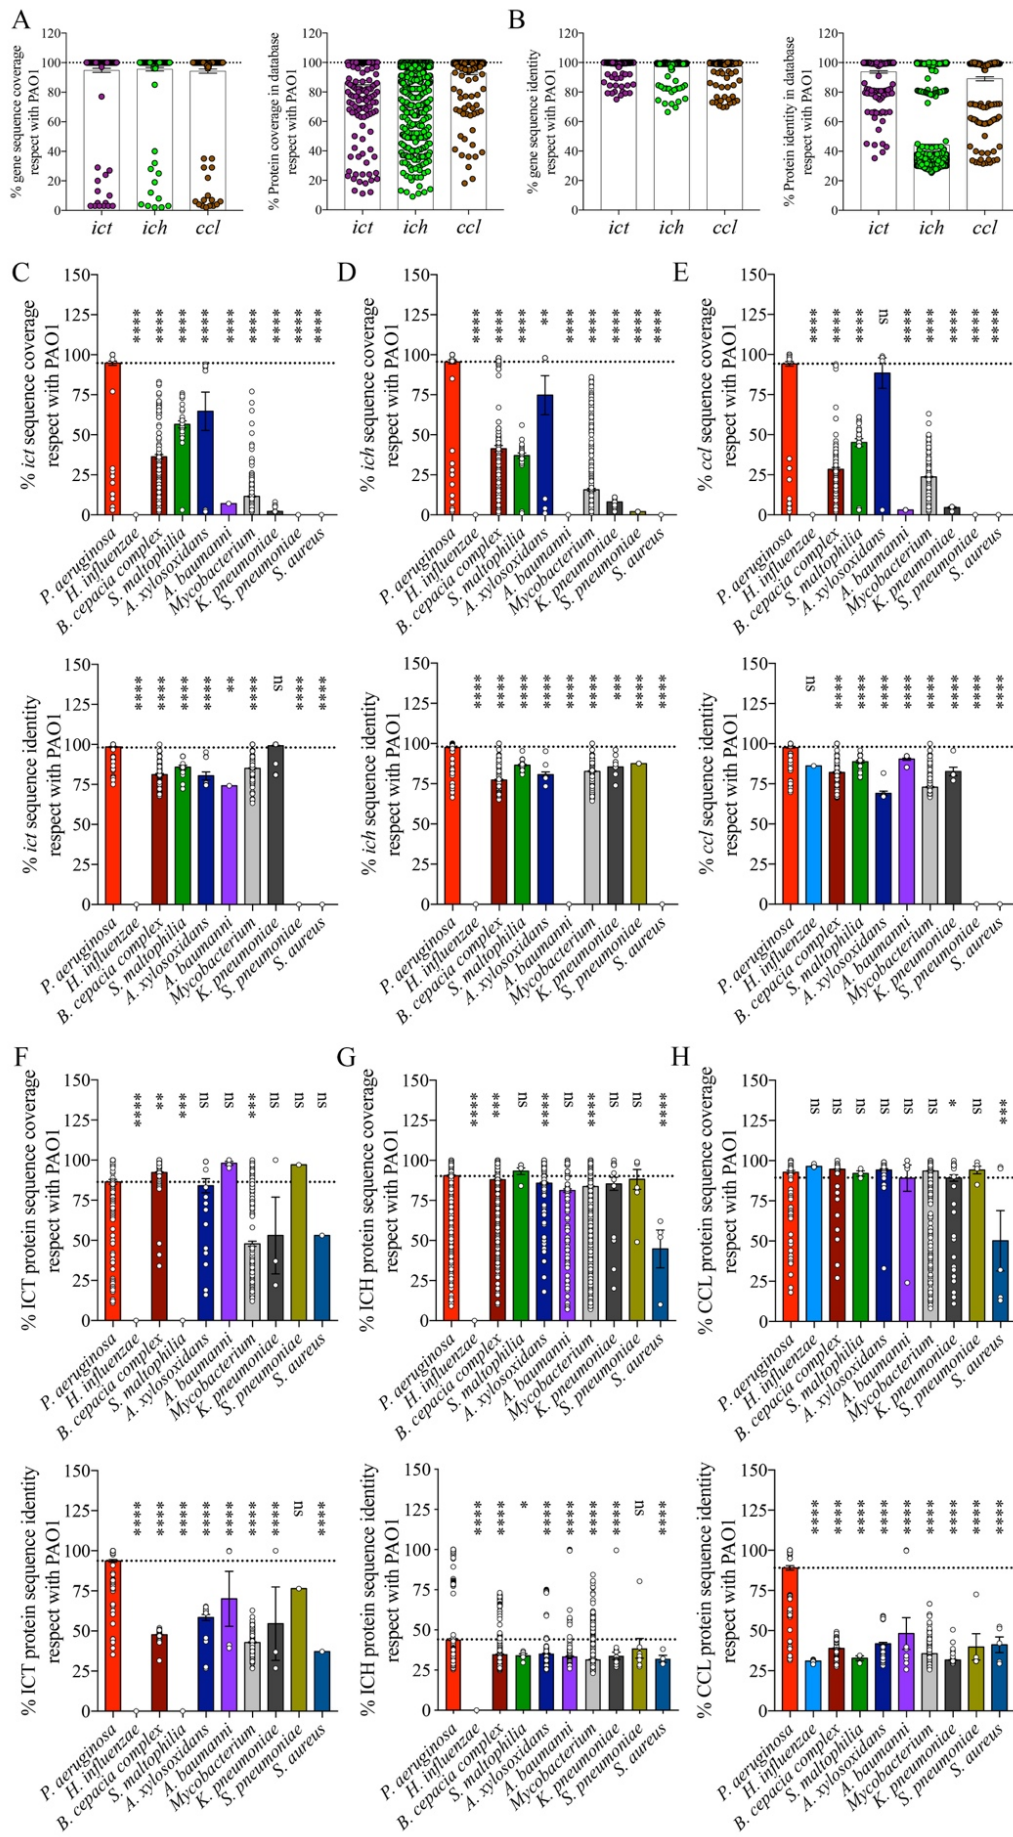

**FIGURE S5, related to FIGURE 6. Genes/proteins that regulate itaconate assimilation are conserved in *P. aeruginosa* strains and are found less often in genomes of other respiratory pathogens.**

**A)** *P. aeruginosa* PAO1 *ict*, *ich* and *ccl* genes were compared against all published *P. aeruginosa* genomes (taxid 136841). Upper panel: gene coverage respect with PAO1; lower panel: sequence identity for the coverage matched in the upper panel.

**B)** *P. aeruginosa* PAO1 ICT, ICH and CCL protein sequences were blasted against all published *P. aeruginosa* genomes (taxid 136841). Upper panel: protein coverage respect with PAO1; lower panel: sequence identity for the protein coverage matched in the upper panel.

**C-E)** *P. aeruginosa* PAO1 *ict*, *ich* and *ccl* genes were compared against all published genomes for different respiratory pathogens. Upper panel: gene coverage respect to PAO1; lower panel: sequence identity for the coverage matched in the upper panel.

**F-H)** *P. aeruginosa* PAO1 ICT, ICH and CCL protein sequences were compared against all published genomes for different respiratory pathogens. Upper panel: protein coverage respect to PAO1; lower panel: sequence identity for the protein coverage matched in the upper panel. Blasts were performed at <https://blast.ncbi.nlm.nih.gov/Blast.cgi>. *P. aeruginosa* taxid 136841; *H. influenzae* taxid 727; *B. cepacia* complex taxid 87882; *S. maltophilia* taxid 995085; *A. xyloxydans* 85698; *A. baumannii* taxid 470; *Mycobacterium* taxid 85007; *K. pneumoniae* taxid 573; *S. pneumoniae* taxid 1313; *S. aureus* taxid 1280.

Data are shown as average +/- SEM. Data was analyzed by One-Way ANOVA. \*\*\*\*\*:  $P < 0.0001$ ; \*\*\*:  $P < 0.001$ ; \*\*:  $P < 0.01$ ; \*:  $P < 0.05$ ; ns: non-significant.

**FIGURE S6**

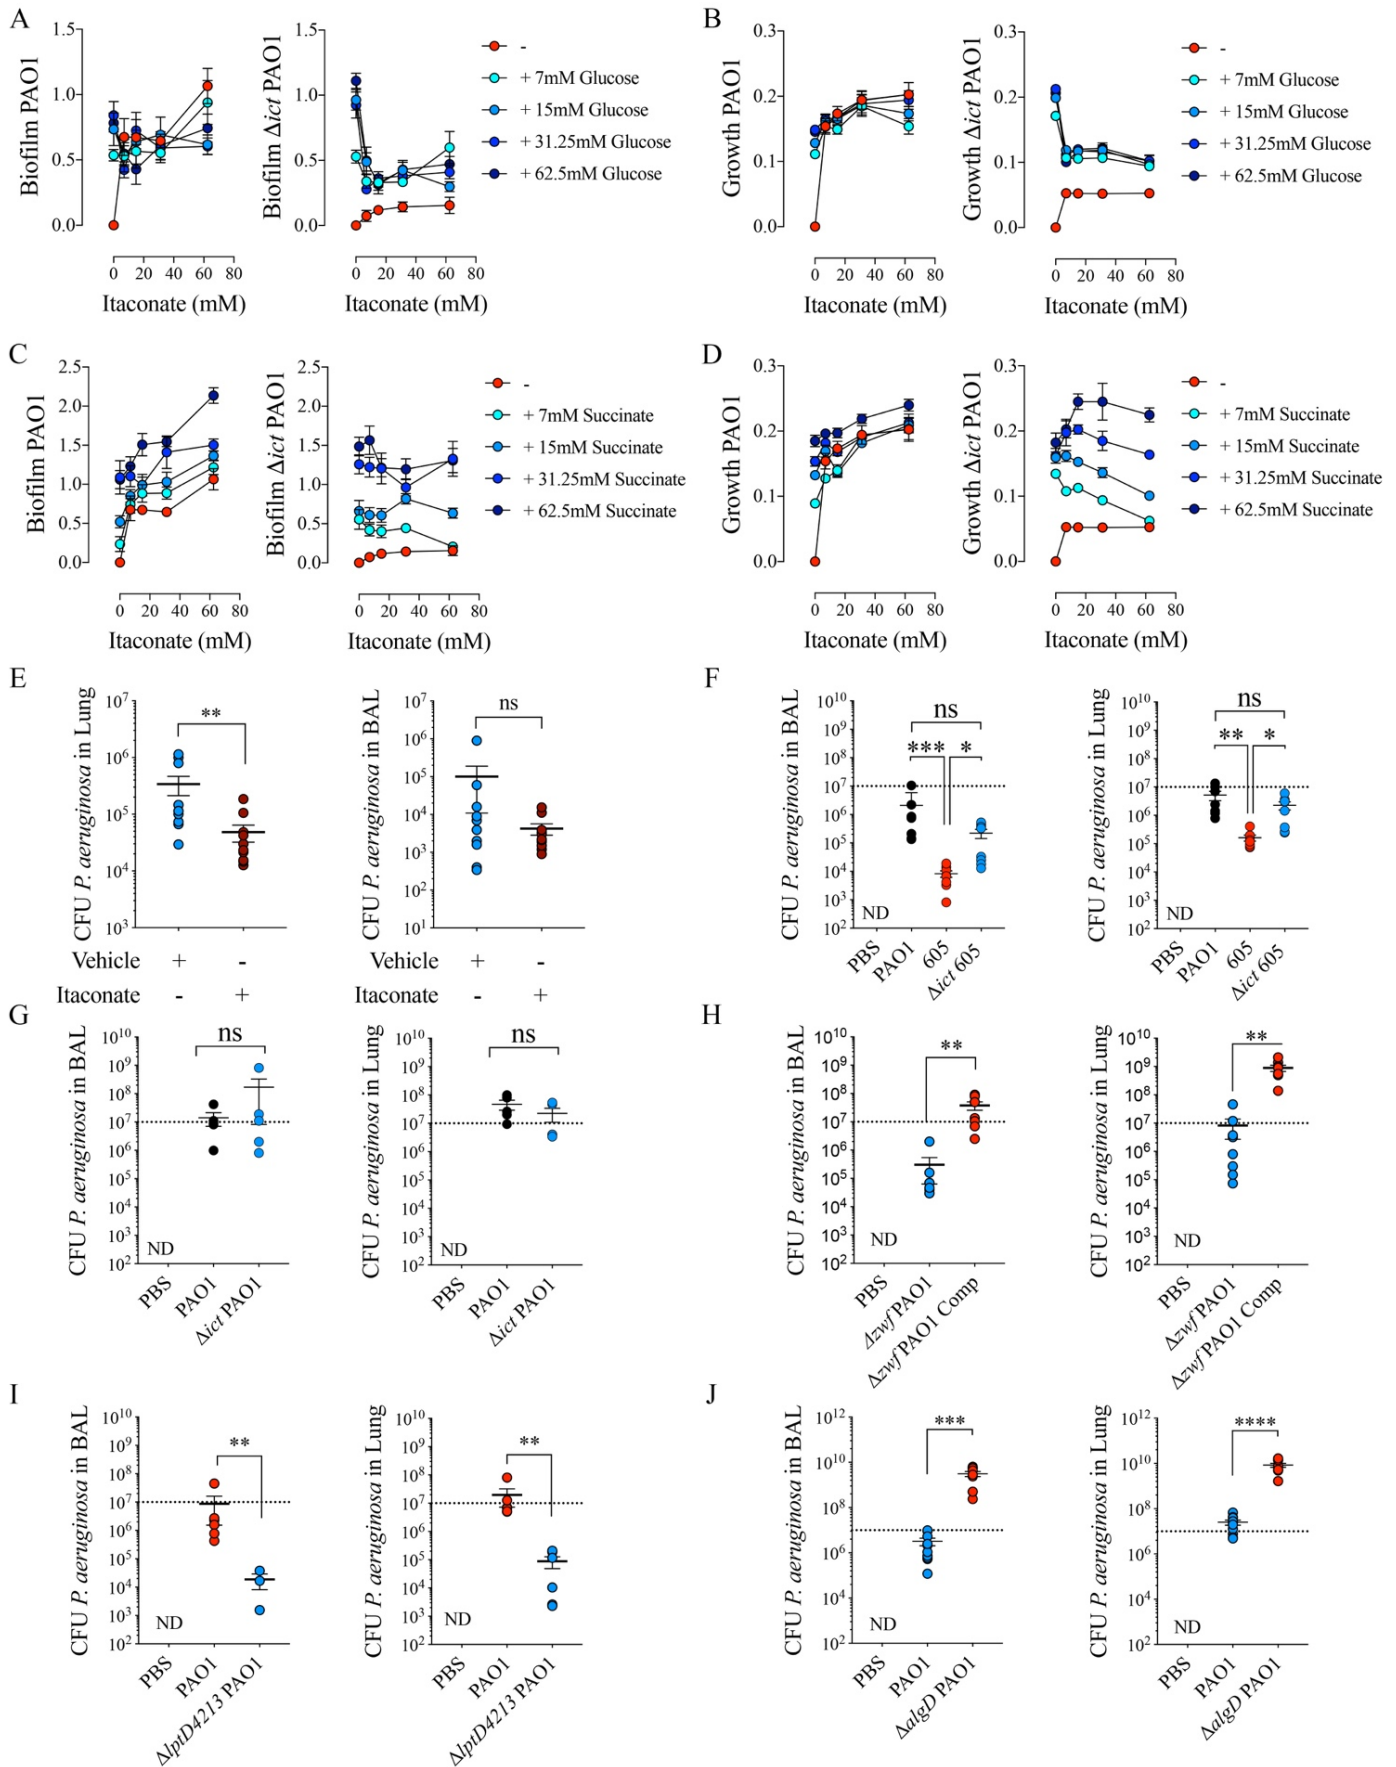



**FIGURE S6, related to FIGURE 6. Long-term adaptation to itaconate stress modifies the infective properties of *P. aeruginosa*.**

**A-D)** Itaconate-based biofilm and growth for PAO1 and its isogenic  $\Delta ict$  PAO1 mutant cultured overnight in glucose (A-B) or succinate (C-D).

**E)** CFUs recovered from BAL and lung of WT mice 16h-infected with a collection of 17 CF host-adapted *P. aeruginosa* isolates and treated intranasally with 60mM itaconate. Itaconate treatment was 24h previous CFUs counts.

**F-J)** CFUs recovered from BAL and lung of mice 16h-infected either with 605 control,  $\Delta ict$  605 or WT PAO1 (F),  $\Delta ict$  PAO1 or WT PAO1 (G),  $\Delta zwf$  PAO1 or  $\Delta zwf$  complemented PAO1 (H),  $\Delta lptD4213$  PAO1 or WT PAO1 (I) or  $\Delta algD$  PAO1 or WT PAO1 (J).

Data are shown as average +/- SEM. All data is from n=2 (in vivo, 5-9 mice in total). **E:** t-Student test; **F-J:** One-Way ANOVA. \*\*\*\*:  $P < 0.0001$ ; \*\*\*:  $P < 0.001$ ; \*\*:  $P < 0.01$ ; \*:  $P < 0.05$ ; ns: non-significant.

**FIGURE S7**

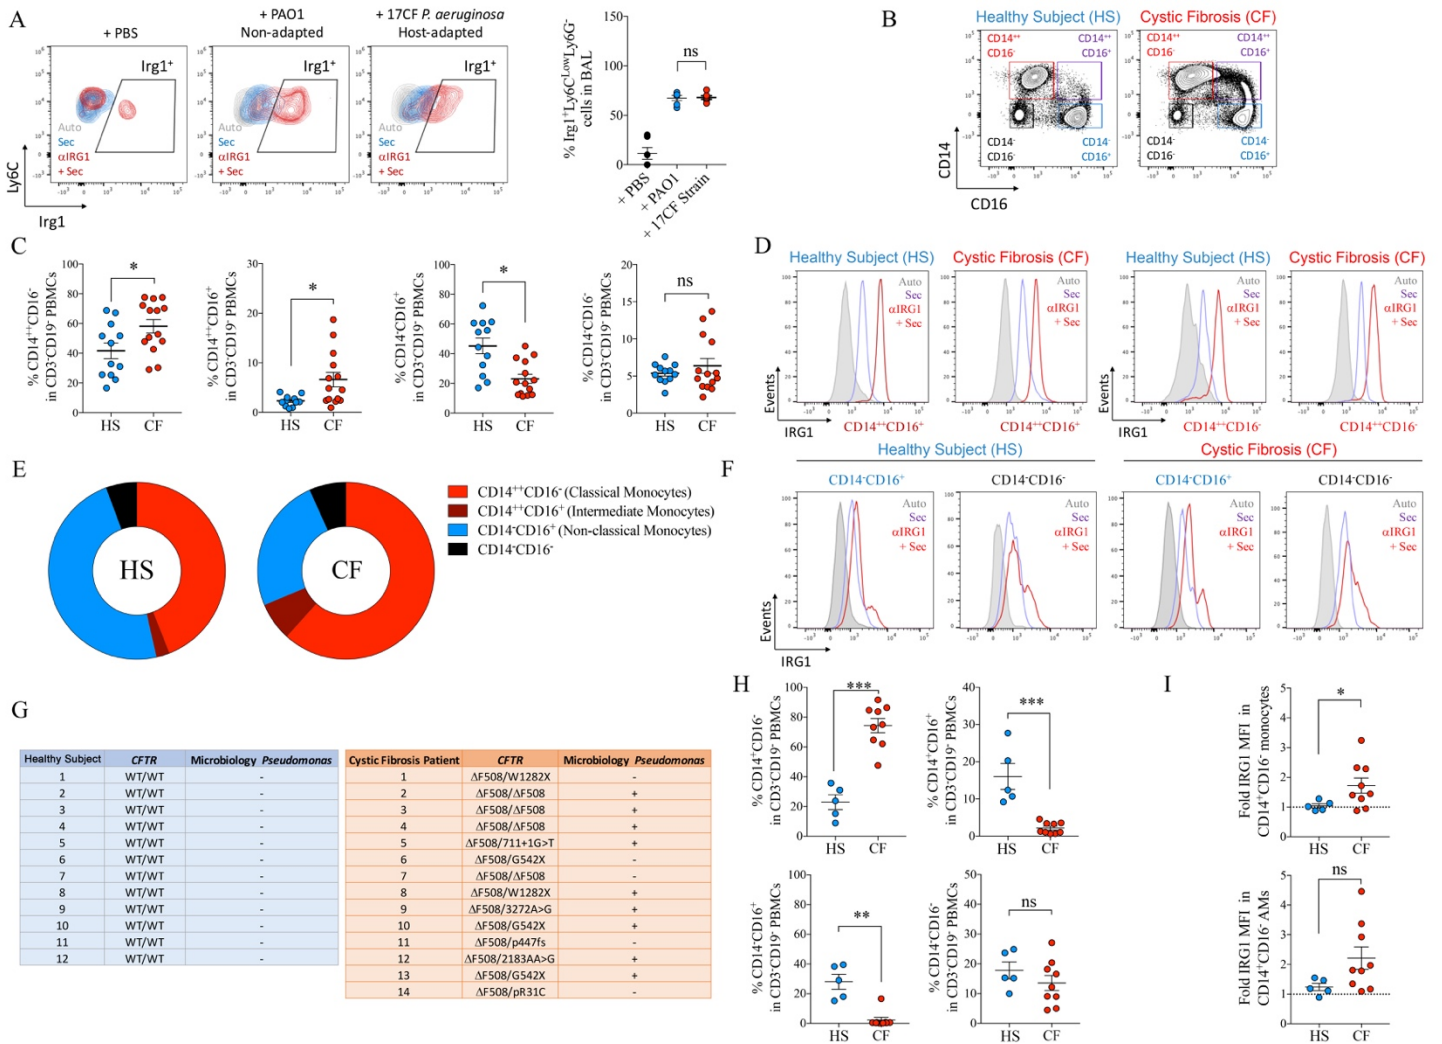

**FIGURE S7, related to FIGURE 7. Local and peripheral itaconate-producing cells are associated with *P. aeruginosa* lung infection.**

**A)** Representative density plots (left panel) and percentage of Irg1-expressing Ly6C<sup>low</sup>Ly6G<sup>-</sup> monocytes (right graph) from mice treated either with PBS or infected with PAO1 or a collection of 17 CF-host adapted *P. aeruginosa* isolates.

**B)** Human PBMCs were sorted (DAPI<sup>-</sup>CD45<sup>+</sup>CD3<sup>-</sup>CD19<sup>-</sup>) and analyzed for monocytes using CD14 and CD16 markers by flow cytometry.

**C)** Dot plots for frequency quantification of the four populations found in B in healthy versus subjects with CF.

**D)** Intracellular IRG1 levels by flow cytometry in the CD14<sup>+</sup>CD16<sup>-</sup> and CD14<sup>+</sup>CD16<sup>+</sup> blood monocyte cells.

**E)** Frequency quantification of the four populations found in B in healthy subjects versus individuals with CF.

**F)** Intracellular IRG1 levels by flow cytometry in the CD14<sup>-</sup>CD16<sup>-</sup> and CD14<sup>-</sup>CD16<sup>+</sup> blood monocyte cells.

**G)** List of human samples analyzed depicting *CFTR* mutation involved and whether patients were actively colonized by *P. aeruginosa* (+) or not (-).

**H)** Percentage of CD14<sup>+</sup>CD16<sup>-</sup>, CD14<sup>+</sup>CD16<sup>+</sup> (alveolar macrophages), CD14<sup>-</sup>CD16<sup>-</sup> and CD14<sup>-</sup>CD16<sup>+</sup> cells in DAPI<sup>-</sup>CD45<sup>+</sup>CD3<sup>-</sup>CD19<sup>-</sup> sputum cells from healthy subjects and individuals with CF.

**I)** Fold IRG1 MFI over secondary antibody staining for CD14<sup>+</sup>CD16<sup>-</sup> and CD14<sup>+</sup>CD16<sup>+</sup> (alveolar macrophages) sputum cells.

Data are shown as average  $\pm$  SEM. A is representative from  $n=2$  with a total of 5 mice. Sputum from 9 individuals with CF and 5 healthy subjects were analyzed. In **C**, **H** and **I**, each dot represents a single subject. In **A**, **C**, **H** and **I** data were analyzed by t-Student test. \*\*\*:  $P < 0.001$ ; \*\*:  $P < 0.01$ ; \*:  $P < 0.05$ ; ns: non-significant.
